# Supplementary material for: A method to determine the correct photocatalyst concentration for photooxidation reactions conducted in continuous flow reactors
Source: publisher site journal article supplement (doi:10.3762/bjoc.16.78), 2020-04-27
Supplement: Additional file 1 [file 1860-5397-16-78-S1.pdf]

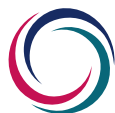

## Supporting Information

for

### **A method to determine the correct photocatalyst concentration for photooxidation reactions conducted in continuous flow reactors**

Clemens R. Horn and Sylvain Gremetz

*Beilstein J. Org. Chem.* **2020**, *16*, 871–879. [doi:10.3762/bjoc.16.78](https://doi.org/10.3762/bjoc.16.78)

### **Descriptions of material and methods, flow setup, and LED characterization**

## Materials and methods

UV–vis spectra were recorded on an Agilent Cray 60 UV–vis spectrometer, using a Hellma High Precision Cell (light path 0.5 mm). All samples were collected in graduated flasks using a valve time-controlled by an Arduino microprocessor in order to validate the liquid flow rate. The conversion of alpha-terpinene was determined by NMR spectroscopy. The  $^{13}\text{C}$ -decoupled  $^1\text{H}$  NMR spectra were recorded with a Magritek Spinsolve 43 Carbon Ultra. The NMR samples were measured as collected. Citronellol samples were quenched with 2 equiv of a 0.25 N solution of  $\text{PPh}_3$  in dichloromethane, and the conversion was determined by GC using tetradecane as an internal standard. The emission spectra of the LEDs were measured using a HERA Admesy spectroradiometer.

All solvents used were HPLC grade. The compounds were purchased and used as received from Sigma Aldrich (phenothiazine 98%, methylene blue, eosin Y 99%, erythrosin B 90%, fluorescein, citronellol 95%) and TCI (rose bengal, 9,10-dicyanoanthracene 98%, 9,10-dimethylanthracene 98%, tetraphenylporphyrin 98%, tris(2,2'-bipyridyl)ruthenium(II) chloride hexahydrate 98%, alpha-terpinene 90%).

## Experimental procedure

As a flow reactor system, the commercially available Corning® Advanced-Flow™ Lab Photo Reactor was used (Figure S1). The solution containing the compound to be oxidized and the photosensitizer were pumped at a given flow rate (e.g., 1 N alpha-terpinene in toluene, flow rate 1 mL/min). The gas flow was started with the corresponding flow rate (here 44.8 mL/min at 1 bar), and the light source was switched on. The back pressure regulator was controlled using compressed nitrogen, and the pressure was increased until 8 bar, as measured at the entrance of the photoreactor. Samples were collected after a

liquid volume corresponding to at least 3 times the reactor volume had passed (here  $3 \times 2.7 \text{ mL}$  at  $1 \text{ mL/min} = 8.1 \text{ min}$ ). Samples were collected into a graduated flask using a valve controlled with an Arduino [1]. The waste was collected in a bottle permanently purged with nitrogen gas.

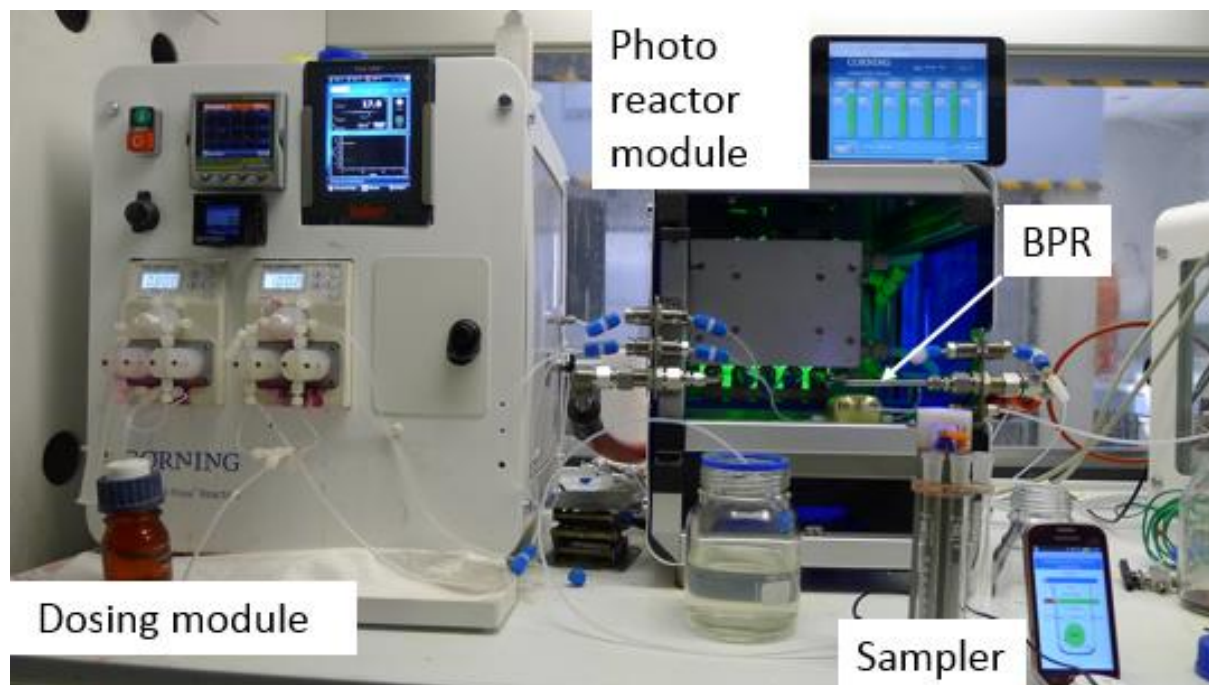

**Figure S1:** Corning® Advanced-Flow™ Lab Photo Reactor setup (the front protection was removed for the picture. Note: do not run a photochemical experiment with an open photoreactor).

### Characterization of the light source

The distance of the light source to the fluidic module (3.4 cm) was fixed. This was optimized earlier using Zemax ([www.zemax.com](http://www.zemax.com)) in order to guarantee a homogenous illumination (Figure S2).

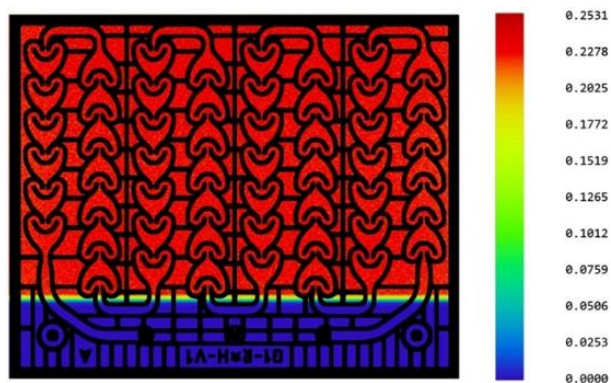

**Figure S2:** Calculated illumination at a 3.4 cm distance (LED-to-module).

Two LED panels containing 6 different wavelengths were used. The wavelength 344 nm was not used. The light power was measured using a spectroradiometer (HERA Admesy), and the measured spectra are shown in Figure S3.

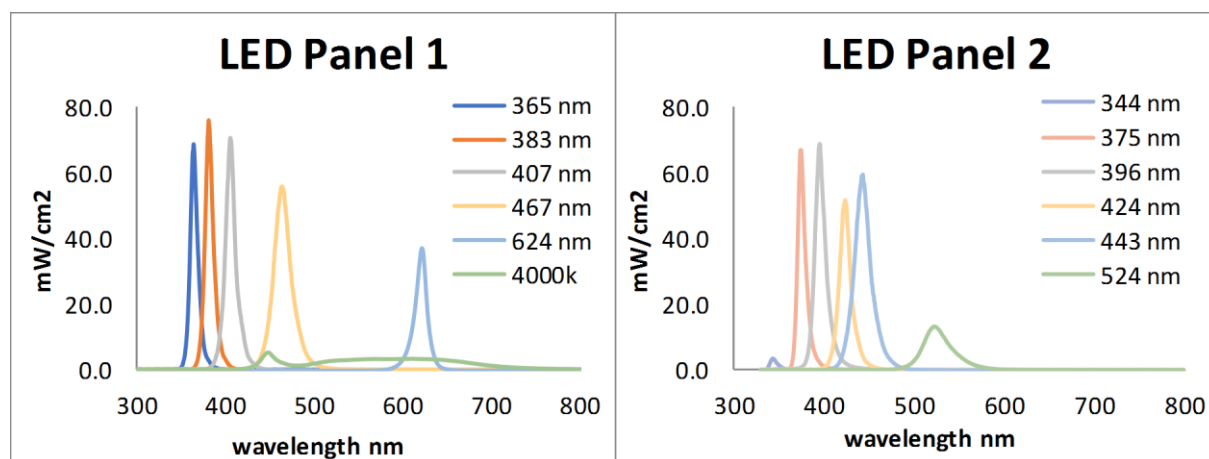

**Figure S3:** Emission spectra of the LEDs.

## Analyses

<sup>1</sup>H NMR analysis was preferred as the much faster method (1 min for one NMR measurement vs 40 min for GC (triple injection)) [2]. Figure S4 shows three

representative  $^1\text{H}$  NMR spectra of alpha-terpinene (1 N) in toluene. The top shows a starting solution while the middle and bottom show an incomplete reaction (3 mL/min flow rate). The top and middle spectra are  $^{13}\text{C}$ -decoupled, and the bottom spectrum is a standard  $^1\text{H}$  NMR spectrum. The integration of the double bond region of the terpene and using the signals of the aromatic system of toluene as references indicated 75% conversion vs 77% found by via GC.

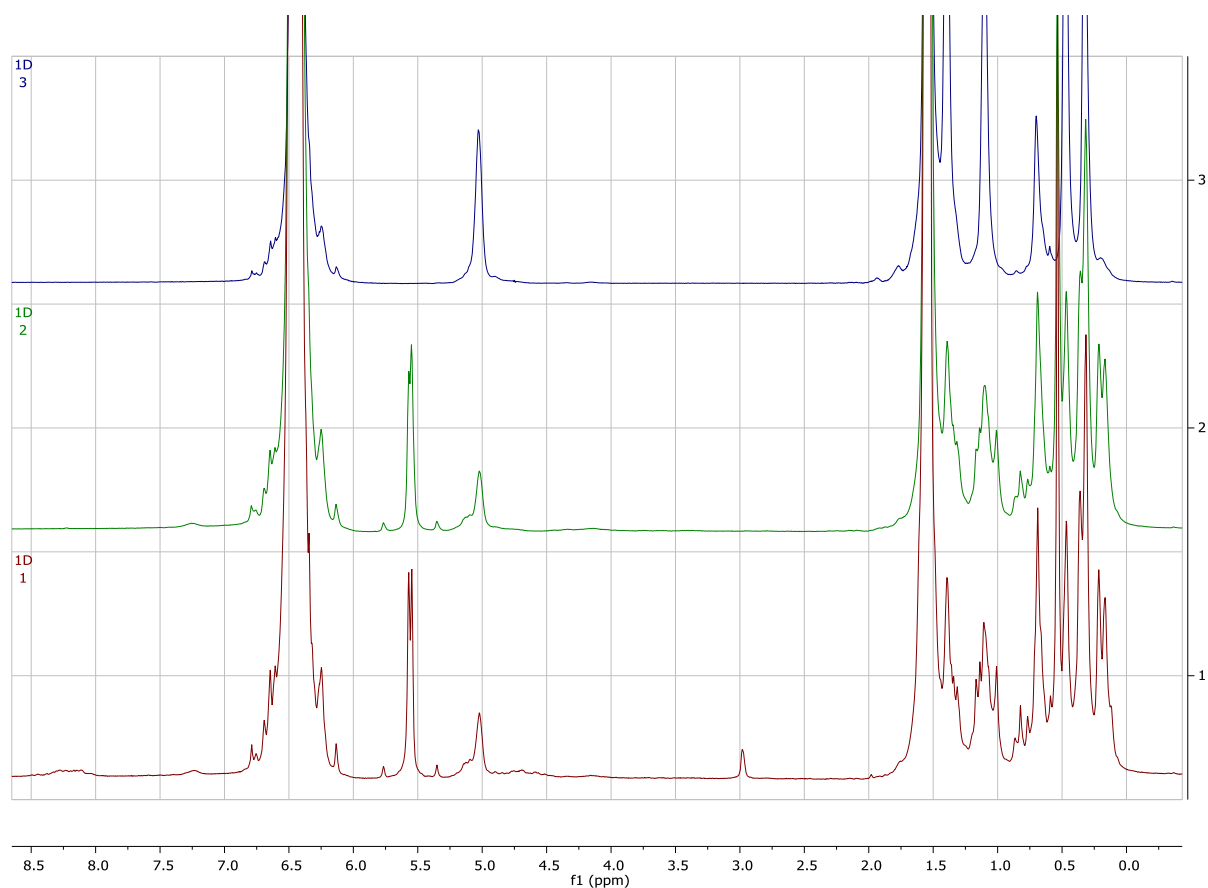

**Figure S4:**  $^{13}\text{C}$ -decoupled  $^1\text{H}$  NMR spectra of the starting solution (top), the incomplete reaction (middle), and a regular  $^1\text{H}$  NMR spectrum of the incomplete reaction (bottom).

## References

1. Details on the sampler: Material list, STL files for the printed parts and application for android phones can be requested from the author
2. Abdiaj, I.; Horn, C. R.; Alcazar, J. *J. Org. Chem.* **2019**, *84*, 4748-4753.
